# Supplementary material
Source: publisher figshare collection journal article supplement (https://rs.figshare.com/ndownloader/files/27858869)
Supplement: Supplementary file 1 [file 27858869]

xread
268 103
Proganochelys_quenstedti	0100001000000011?000-000?????000100000-00000-00020010010000000000101??100000?0??000003?100?0-00-0000-000??010010000?01000000000000000000-0000000001000?0210-0001?0001000010???0???100?????000?0000???0002?0000010?????000101??0?0100000?000000???1?0-1000011000000???0??0000
Platychelys_oberndorferi	????????????????????????????????????????????????????????????????????????????????????????????????????????????????????????????????????????????????????10?????00??1??0??????00?000001110211-00110100110000012000100011110000000??11000000100010111012000???????????????????????
Notoemys_laticentralis	??????????????????????????????????0??????????????????????????????????????????????00000?0???0?0?-??1010????0?1000000?0?00?0000000?0??????????????????10?????00??1?1?0?????00200000100021100011?101020000000000111001110000000??11000000100010?1?0??0?????????????001?2???????
Pseudemydura_umbrina	000000000010030--0000000?0???000102001010?00-0001120000000000?-00000?01?0000-0??000000001000001-??20202000?000010000010??000010010??00?0?00000??000?????????????????????011114?????0011000???????????001110000010?1110??1012??112111?110011111???1?001??????????020?2??????0
Elseya_dentata	000000000110030--100000000???000102001010001000111200010000100-00000?0110000-000120000000000001-00102011000100?2000001000100010020??0000-0001000000?100000010000000102?0001104-?---0011100102011101111--111010001-1110100112??1121??-0??010001??12?00100010110000101211001?0
Emydura_macquarii	000000000110030--100000000???000102001010000-00010200000000000-00001?0010000-0?0120000000000001-00102010000100?2000?01000000000010??0000-0001010000?1000?0010000000112?0?01104?????001110010211100101001111000000?111010011200112100?010010001??12000100011111000211201001?0
Myuchelys_latisternum	000100?01110030--100000000???000102001010001000011200010000000-00000?00?0000-0?0020000000000001-?010201000?10?02?00001000100010011??0000?0001010000?1000?0010000000102?0?01104?????0011100102010001111--111010010?1110100102??112100?010010001???2?001??????????0???21?????0
Acanthochelys_radiolata	0?0001?00110030--123000000???000102001010000-00010200100000000-00000?0110000-000020000001000001-00102110000?0??2100?0?000000012010?????????1????????1000000??01??0012???00?104-?---011110110201020211001111011100-1110??0002??202100-01001100100111001?????????????????????0
Platemys_platycephala	0?0000000010030--110000000???000100001010000-01010000100000000-00110?0110000-000020000001000001-0021211000010??2100000000000012010?????????1????????1000030??12??0010???002104-?---111100110201020200001111001100-0111100002??212100-010011001000?1001??????????020?0??????0
Phrynops_hilarii	0?0010?00110030--123000000???000102001010000-00010200100000000-00000??110000-000020000001000001-0021211000010002100?00000000012010??0010-00100??0?0?1000100??01??0010???00110231000011110110201020200001111011100001101?0000??112100-00001101100010001?????????00211210101?0
Phrynops_geoffroanus	?00?10000110030--123000000???000102001010000-00010200100000000-00000?0110000-000020000001000001-00212110000100?2100?00000000012010000010-0010000000010?????10??01?01?200?0110[2 3][3 4]1000011110?102??01?2??0?1111011100001101?00?0??112100-0100110110?01000100011111000211211011?0
Mesoclemmys_nasuta	0?0010?00110?30--123000000???000102001?1?000-?001020010000000?-00000??110000-000020000011000001-00212110000100?2100?00000000?12020??0010-00100000?0?1000100?001??0010???0????34?1300121101102???2?2??001111011100001101?0002??112100-010011001???1?001???????????????1?????0
Chelodina_colliei	200100000210030--?32000100???000102001110010-?0010200100000001-00101?0110000-000020000001000001-0010201000010?02100000000000012001??0010-0010000000?1110220?0010011102?01011125110000010011020102001100001101110100001000002??122111-110010001??1-0101?????????00101200001?0
Chelus_colombianus	?????????????????????????????????????????????????????????????????????????????????????????????????????????????????????????????????????????????????????????????????????????0110120001111[0 1]10[0 1]???021?2?10?????1??1100????0100000??1?2100?0?0011001001-011???????????????????????
Chelus_fimbriatus	201-00?00110030--123000000???000102001001010-00010000100000000-00100?0110000-000020000001000001-1020201000010002100?01000000012000000010-001000000201100210100000111220000110[0 1][0 1 2]00011111101201011221010001110111001111010000001112110-000001001001[0 1]001111011111000211200001?0
Hydromedusa_tectifera	200001000210030--132000000???000102001010010-0001020010000000--00000?0111000-000020000001000001-0020201000000002100?01000000012001??0010-00100??000?1111221?0120011112?01010111001001111011020003010101011100011000000100002??112100-0100111010011100100011111000101201001?0
Hydromedusa_maximilliani	2?000????????30--?????????????????????????????????????????????-?????????1???????????????????????0???????????????1??????????????????????????1????????1111221??12??1111???101001100100101101102000301??01011101001001110??0002??1[1 2]2100-0100111110011100????????????????0??????
Bonapartemys_bajobarrealis	???????????????????????????????????????????????????????????????????????????????????????????????????????????????????????????????????????????????????????????????????????0?11200110?00021100????1110211???1?101110100100100000??1111000010010101?????01???????????????????????
Prochelidella_cerrobarcinae	?????????????????????????????????????????????????????????????????????????????????????????????????????????????????????????????????????????????????????????????????????????01200110?00122101?????????0100111101?10011110??0012??110100001001100110?1001???????????????????????
Yaminuechelys_maior	2??????0?????30--11????1?????00???????????????????????????????-???????????????????????????????????????2000?0?0??1???????????????????00?0-00100?0?00?11102200?130?1110????10200110000011100??21102011100011101111000110??01?0??110000001001?111101??01???????????????????????
Yaminuechelys_gasparinii	2?0100?00210?30--112?00100???000???????00?????????0?0????????0-0????????1??0-??0??????????????????????200000???????????????????????????????1????????11?0??00?12??1110????1020011000001110010???02?1??000111011110001100????1???100??0??????101??1???01?????????????????????0
Pelusios_castaneus	101-010000000111-23200010?1010001000000000010010??00001000010?001????0110000?000220000001000001??020200100010102??0?010000000000110010?0?00[0 1]1010?00020??0???0??1-001?20?00??01?1??00??1??010200-?0?001??111000000[0 1]????1?0112???101???01?0?1011??010001????????????????????00
Pelusios_castanoides	101?01?000000111-23200010?101000100000000000-0000-000010000100001????0110000-0??220000001000001-1?202000000101?2000?01000000000011??1?10?000101??00?20???0010??1-00102?10011022113000211001?200-101001??11100000000110100112??1101001010011011?00100010101111001000120??0100
Pelomedusa_subrufa	101?010000000111-232000100101000100000000000-0100-000010000000001-?-?0110000-000220000001000001-1020200000010102000?01000000000011001010-00110100000200000010131-001020100210121[0 1]00011111010200-101001??11100011000110100112??1111000010011011000100020101111001000120111000
Araripemys_barretoi	2?1?010002000211-230000100?-?000100000000010-01020000000000000001-?-?0010000-000200000001000001-0020200???01000[1 2]000?00000000000000??1000-0010011?00021????010021-111120??122000102000101001?200-101011??21110112010110000111??022000-020-?11?1?1?-?00101010111010011201[0 1]0100
Laganemys_tenerensis	201?010002000210021000000????000100000000010-?????000?000??0?0000??1?0010000-0?02000000010?0001-0020201000010101000?00000000?00100??1000-0011000?00?210??1010????1111????102001002000100001?2?1?111??1??2111010000????000111??0210001020-?11?1???-?001????????????????????00
Euraxemys_essweini	101?0100010002100210000100?0?000100000000000-00020000010000100000101?0010000-000100000001000001-?0100010??011001010000100100000120??1000-0011010?00120?????10??1-?11?2???011?00100000111101?2???1?1??1??1010???00?0110100111??1?11000010011101?0?1?001?????????10????0????00
Dirqadim_schaefferi	101?0100?10?02?0011000?00????000?00000000010-01?0-0000100?010000?????011000?????100000001??0001-?02010????0110?1010??0100100000120???????????????????????????????????????????????????????????????????????????????????????????????????????????????????1??01?010?1001?20?10100
Sokatra_antitra	101-010001000011-221000100???000100000000?0???????00001000010100?????0110000-0002110-00000?1001-?010211?00010?0101???0100?0?0?0012???0?1??0??1??1???????????????????????????????????????????????????????????????????????????????????????????????????????????????00??2?????11
Sahonachelys_mailakavava	101-111002000111-221000100???000100000000000-010200001-0000001001----0110000-0002110-0?01?01002-?010201000010100011000100100000012001010-00000100000200000010??00?010101?02202310000[0 1]21110??2?1?112001--101001?100[0 1]110100012?[0 1]1111101100000001???3?0010001011101020120100101
Kurmademys_kallamedensis	001-010001000111-231000110???00010000000000100100-00000110000010?????1110010-0012110-00001?1112-1000200100110?020210002001100100120?1001000012101010???????1?????????2???011023100001211101?201011?001--1?100??0000110???112???111111??0??000100??1?01??????????0?????????10
Sankuchemys_sethnai	?01-01?00100??11-231?001??????00?00000?00?0??010??0000?11001000001110?110000-0?????????0???11?????10200???0101???20?002001?????012?????????????????????????????????????????????????????????????????????????????????????????????????????????????????????????????????????????0
Jainemys_pisdurensis_(composite)	?????1?00100?????????00?10????0?10??????????????????0?0110000?000?011?110000-0?????????0???111?????0??????0?0?????110??001?????012??????????????????????????????????????????0[0 1 2]?10000121??0??????1?2?????11100??10???????0012?01111111110010001???1?0????????????????????????
Atolchelys_lepida	??1??10??????????????0?????????0?000????0??0-010?????11100000???0111??010000-0?????????01??01?2?1?2001??????0????11?001??1???1?012????0?????????????????????????????????????????????????1???????????????????????????????111?????11?????0????11001?0?0??????????????????????0
Cearachelys_placidoi	001?010001000011-221000100???01010000000100??0?0??0000011?0000100??1?0110010-0000[0 2]0000010101112-101000010011010102100021010101002200100100000210?010???????1???0???1?????011000101000[1 2]11101?20??112??1??11100011011110100011??1111000010011001?001?001??????????0?0???????00
Galianemys_emringeri	001?[0 1]100?10?00?1-22?00?100???010?0000?001000-000??0000?1???00010?????1?1?010-0??011010010??1112-1010000100110001?21?002101010101?200?????????????????????????????????????????????????????????????????????????????????????????????????????????????????10011110001010110100100
Galianemys_whitei	001?0100?10?00?1-21?00?10????010?0000?001?00-000??0000?1???000100?0??1?1?010-0??011010010??1112-?010000100110001?21?002101010101?200?????????????????????????????????????????????????????????????????????????????????????????????????????????????????111111101010001101[0 2]0100
Kinkonychelys_rogersi	001-1100010001????1?000??0????0?10????000?????????00000110000000?????1????10-0002110-0010??1?1?-101000????1?01020210002001100?002200????????????????????????????????????????????????????????????????????????????????????????????????????????????????????????????0??????????0
Foxemys_mechinorum	001?1100?10?1011-21100?10????00010100000100110000-000111100000100101?1110010-0??010000110??1112-?010000100110101021??0211110010022??11?11?000211?11????????1??????11?2???0110121?0?0111?101?201111?0[0 1]1??11100011000110?11111??101111[0 1]0110110?110011001??????????0?????????00
Foxemys_trabanti	001?110001001???????00??0????00010100?0?1??????????001111?0000?0?????1?1?010?0???10000110?01112?1010000100110101?21100211110010022??11?11000021101??2??????1???????1???0?01??121?0?011??????2?1??1?0[0 1]1????10????????????1?????1?1??100?????0?1?0????????????????0??????????0
Polysternon_provinciale	001?11?0?10??0?1-21??0?1?????000?0?00??01?0110??210001?110?00?10?????????010-0??010000100??1112-?010000100110111?21??02??11001?0?2?????????0?????????????????????????????11??121?0?0111?1?1?2?1?11?0[0 1]1??1110??110??????10??2??111?1110?101?0?1?0?1100???????????0?????????00
Araiochelys_hirayamen	011?0110?10?1??1-21??0?1?????000?1100?0000110000210101?210?010??0?0??1???020-0??011001110??1102??020111100110102?21??02111100101?2??11?11?10?001?11??????????????????????????2?2?0???1??????2?1?11??????101???110??????????1???21?101??0???0?1?0??0?0111100001011000???0???0
Zolhafah_bella	001?11000200?????????????1????0?01??????000110?0??000111110010??01?1?1110020-0???110011101?1?0?-?010110???0?0?02022?0021?1100?002200?????????????????????????????????????????????????????????????????????????????????????????????????????????????????1??????????1??????????0
Rosasia_soutoi	001?1100?20?10?1-???00??01???000?1????0?10010000210001?220?010110?0??1?1?020-0??01100?110??1112-?01000??????0?????????211110???1?200?????????????????????????????????????11??121?0?0101?1???????1????1??1010??010??????11??1???11?0000?001?0?1???11002??????????1??????????0
Bothremys_maghrebiana	011?111002001011-21110?110???0000110[0 1]0000011000021121112200010110101?1110020-0??011001110??1002?10201101001101120211?021111001[0 1]12110110100100201011??????????????????????????????????????????????????????????????????????????????????????????????????11110000011100??0?????0
Bothremys_cooki	011?111002001???????10??10???00?11????0?0011000021121112200010??0101?1110020-0?????????101?1?0?-1?201?????1?0?0202?1002??11?011?21101?01001002??01???????????????????????????????????????????????????????????????????????????????????????????????????1?110000?1??0?0001????0
Bothremys_arabicus	0???1??0????????????1???10??????11????0?0??11?0021????1220001???0101??1?0020-0??01100??1???1?0?-?02011????1?0102022?0021?11001?121??????????????????????????????????????????????????????????????????????????????????????????????????????????????????????????????????????????
Bothremys_kellyi	011?11100200?0?1-21??0?1?????00?01100?00001110?0??0211?220?01??1?????1???020-0??011001110??1?02???10111100110102?22???21?1100111?1???????????????????????????????????????????????????????????????????????????????????????????????????????????????????1111?000?1?1?0??0?????0
Chedighaii_hutchisoni	011?111002001??1-21?10?11????00010100?000?????????011??22??000100????1?1?020-0??01100?11???1002??020110100110102?21??02111100111?1????????????????????????????????????????????????????????????????????????????????????????????????????????????????????????????????????????00
Chedighaii_barberi	0?1?11?0?20?????????10???????00??010?0??0??????0??011111??0000???????11???20-0??011?01110????0???02011????1?0??2?21??0211110?1112110?1?10?10?2010?1????????1??????11?????1111131?0?0120?101?201011?011??11100011001110?11111??12111000100110011001000??????????????????????0
Taphrosphys_sulcatus	001?01?00?0???????1??0????????????0110???10???????0??????????????????1??????????011100?0?1?1?0??11101111000101020201?0211110010022?1???????????????????????1??????11?2???0110121?0?0110?101?20[1 2]111?011??11100?01001110?01112??111110?11001110111?1000???????????1??????????0
Taphrosphys_ippolitoi	001?01?0010??010?11??0?1?????101?0011?10010100?0210101?0???00101?????101??0??0??0111001001?1??2??110110???0101020211?02??110010022?1???????????????????????????????????????????????????????????????????????????????????????????????????????????????????11000010?121001100100
Taphrosphys_congolensis	0?1?0??00????0100110?001?????101?0011010?10????????10??????????1?????111?????0??011?0?10???1??????1011?1??01010202110021111001?02200???????????????????????????????????????????????????????????????????????????????????????????????????0?????????1000?????????????????????00
Acleistochelys_maliensis	001?01000000001???1?000100???00111?00010001100100-010110000111?10111?1110100-2000110001111?1010-?01000????110012021?00211110010121??????????????????2????????0000????????????????????????????????????????????????????????????????????????????????????1??????????0??????????0
Azabbaremys_moragjonesi	001?0100000?0011-21?00?10????001?0100?100010-1100-0100?00??001010?1??111?10??1??011003110??1012??020110100010102?21??02111100101?100?????????????????????????????????????????????????????????????????????????????????????????????????????????????????1??????????1?????????00
Labrostochelys_galkini	111?01100?0??0100???00?1?????10??0?11??0001110?0210201?00??001010?????11?00??0??0111011101?1?02??02021????0?0112?21??02111100101?2???????????????????????????????????????????????????????????????????????????????????????????????????????????????????1010000000110000010?100
Phosphatochelys_tedfordi	011?0101010?0010011?01?11????001?0011?11010100100-0011?00??00000?????111?10??0??0111001101?1102??120110100010102?21??02111100100?[1 2]???????????????????????????????????????????????????????????????????????????????????????????????????????????????????1111000011112100111?100
Ummulisani_rutgersensis	011?0101010?0010011??1??0????001?0011?11010100?00-0011?0???00000?????1????0?????0111031001?1?0???120211???010112?21??02111100?00?2??????????????????????????????????????????????????????????????????????????????????????1?????1?1?1001?000?1???1?000021110000111120?011[0 2]01?0
Rhothonemys_brinkmani	011?01?00100?????110?101?????00????1?01?0?1???????001????????????????1??????????011100?????????????????????????20?????????1??10?????110000000000011??????????????????????????????????????????????????????????????????????????????????????????????????1?????????????????????0
Arenila_krebsi	0???01?00100?0????1?00???0???00?101???0???0???0?2101000000000???0101?1110?00-1?0011?031201?101?-??1000?1?0??0112021?002111?0?1?221??????????????????????????????????????????????????????????????????????????????????????????????????????????????????????????????0??????????0
Nigeremys_gigantea	001?01?0010?00?1-21??0?1?????00??00???0?000101012101000000000???0101??0?0100-1??0110031201?1012-?0????0????10?12????0?2??110??0221???????????????????????????????????????????????????????????????????????????????????????????????????????????????????1??????????0??????????0
Brasilemys_josai	0????????1??011???2?000100???000?0000000????????????00?0??000000?????01?001??0001000010010011120?0101000--11100101100?200110000022??1000-00010100?2?20?????00????0?1?????0110111000001????1?2?10?1?001??111000000??????????????1?????????????1??????????????????020???????0?
Hamadachelys_escuilliei	0?1?0100010001100220?0010010?000100000000?0???????010010100000000??1?0110010-0002200010010011120?01010?1?00100020?1011200110000022001000-0001010?021??????????????????????????????????????????????????????????????????????????????????????????????????11110011010201?011?100
Portezueloemys_patagonica	0???01???100??1?012????1??11??????00????????????????????????????0??1??1?00?0-0???2?????0??011130??101??1????0?????1011?0?11?00???2??????????????????????????????????????????02210?000?????????1?112??1??1?1?0?020????????11???1111101?100????1??0???0???????????????????????
Bauruemys_elegans	001?0100010001100120000100000000100000000000-01021010010100000000101?0[0 1]10010-0002200010000011130?010101100010002011011200110000022??1000-0001010?02?20?????0011????10200?01102[2 3]101000211001?2010112001??10100000000110100111??111111101001100110010001111101100?020?00?10100
Cambaremys_langertoni	????????????????????????????????????????????????????????????????????????????????????????????????????????????????????????????????????????????????????20?????0?????????200?02101210000021??0???010112??1??11100?0000?1???????1???11??11????????1000?0?0???????????????????????
Peiropemys_mezzalirai	001?01000100021011100001?000000010000000??01100021010000100000000101?0010010-0002200010000011130??10101101010002011111200110000022??????????????????????????????????????????????????????????????????????????????????????????????????????????????????????????????0?????????00
Lapparentemys_vilavilensis	001?01000100021011100001?0000000100000000001100021010010100000000101?0010010-0001200010000011130?010101101010002011111200110000022??1000-00010100?20????????1????????10??011012100000211001?2010112001??11100000000110100111??11111100110110011001?001??????????0201??1???00
Pricemys_caiera	0????????1????10?11???????2?1??0?00000?????????????100???00000????????????10-0?0120001000001?130?01010???10100020111112001100??022??????????????????????????????????????????????????????????????????????????????????????????????????????????????????????????????0??????????0
Podocnemis_vogli	001?01-0110001101110001100000000?00000010001100121010011010100000101?0010010-0002200010010011130001010110101000200111120011000002200100111001110?120?0??????1??????1??1??011011100000201101?2011112001??001000111????0??011100111111101001101110010001??????????01????????00
Podocnemis_lewyana	0?1?01?01100??101?1?0?1102100000???0???10????00121???00??101????1-?-?00100100000220001??10011?3000101011?1?1?002001111???11??0????001?0??1?0??????20?0??????1??????1??1??01101210000020??01?2011012001??0010001100011?100111??11111110100110011001000?????????????????????0?
Podocnemis_unifilis	001?0100110001101110001100100000100000010001100121010001010100001-?-?0010010-00022000100100111300010101101010002001111200110000022001001110011101120200??00111300011011000100[1 2][2 3]100100201001?2011012001??0[0 1]1000110001101001121011111[0 1]1010011001100100021111111001010100110100
Podocnemis_erythrocephala	001?0100110001101110001100-000001000000100011001210100110101000001?1?0[0 1]10010-0002200010010011131001010110101000200111120011000002200100111001110?120200??000101010110110?020012100000111101?2011012001??1[0 1]10001200011010011211111111101001100110010002????????????????????00
Podocnemis_expansa	001?0100110001101110001102100000100000010001100111010001010100001-?-?0010010-10012000100100111310010101101010002001111200110000022001001110011101120200??0011130001101100011012100000201001?2011012001??0[0 1]10001200011010011211111111101001101110010001011111??0101????????00
Podocnemis_sextuberculata	001?0100110001101110001102100000100000010001101111010001010100001-?-?0010010-00002000100100111310010101101010002001111200110000022??10011100111011202000000111101011011000110[1 2][2 3]1[0 1]0101201101?2011012001??0010001100011010011210111111[0 1]01001101110010001??????????01????????00
Podocnemis_bassleri	0?1-01001100?1101110?0110?100000100000010001-011??00100101010?00???????10010-000?20001001001113??010101101010002?0111?2??110???022?????????????????????????????????????????????????????????????????????????????????????????????????????????????????????????????????????????0
Peltocephalus_dumerilianus	001?01000000001011001001?0201001?0000000100101100-010011010100001----0110010-00012000100000111320010100100010002001101200110000022001001100011101121200??0011010001101000011012100000211001?2011112001??0010001200011010111101111110[0 1]01001100110010000??????????1?????????00
Erymnochelys_madagascariensis	001?01000000001011001001?0101000?00000000001001021010011010100001----0010010-0002200010000011132001010010001000200110120011000002200100110001110112120???0002130101101000011023100000211001?2011012001??10100011000110100112??11111110001010011?020000??????????1?????????00
Cerrejonemys_wayuunaiki	00??01?00100??101110?011??000000?0000??1??????????010?????0?00001-?-??0?0??0-0???2???1???0?1?13??0????11?10100??001??12001???00022??10111000?1??11??20?????11??????1?11??0110??1000002????????1?1????1??10100?110??????????????111??1??????????????????????????????????????0
Stupendemys_geographicus	001?010001000?101?10000?00101000?00000000001000021011011010100000101?0??0110?000020002011001113??01010?1?10?00020011112??110000022??????????????????????????1011-??101?0?1110121000002????1???1????001????101?1000???0?????????111??1??0????01100?0?02??????????0??????????0
Dacquemys_paleomorpha	001?0100000001101000?000??010000?00000?00000-1000-01001101010?001----02-0?10-0?0220001000001113??0101021010100020011112??110000022????0111?001???????????????????????????????????????????????????????????????????????????????????????????????????????1?????????????????????0
UCMP_42008	011?01?00000?0101000?000???1?001????00?00?0???????01001??1010?00?????0???????????2?0??1??00?113???????21--?0?????????????????????????001100001?0?1???????????????????????1????????0??????????????????????????0???????????????????????????????????????1?????????????????????0
Carbonemys_cofrinii	001?01000000??101100?0010????000?0000?000000-0100-01?01101000000??????2-0010-0???????1?1???1113??0????01010100????11??2001???00022???????????????????????????????????????????????????????????????????????????????????????????????????????????????????2?????????????????????0
Kenyemys_williamsi	?????????????????????????????????????????????????????????????????????????????????????????????????????????????????????????????????????????????????????????????????????????11112210010011110????????2??1??00100011001110100112??1111111000101001???2?00???????????????????????
Turkanemys_pattersoni	001?01?0000001101100?001??00?000?0000000100??010??01001101010?001----0010010-0??220001000001113??010100101?10002??110?2??1???00022??1001110011?01?2?2???????2????????????01002310000011100???111012001??11100011000110100112??1111111000101001?0010000?????????????????????0
Neochelys_fajumensis	001?010000000110?100?00101000000100000000001001021010011010000001----0110010-0001200010000011132?0101001?10100020011012?01100?0022??1?011000?1????2????????????????????1?01?0[1 2][2 3]10000??1101??????112??1??11100?1100011010?112??111111[0 1]00010100110?2?001?????????0??????????00
Neochelys_arenarum	001-0100000000101100?0010?30000010000000100100102101001101000?001----0010010-0002200010000011132?0101001??010002?0110?2??110???022??1??11000??10?12??????????????????????01??2310000021?????????11???1???0?00?1???????????????1111111[0 1]10001??1???1?0?1?????????????????????0
Neochelys_franzeni	0?1-01000000?0101100?0010?300000?0000000000???1???0100??????0?00?????0?1?0?0-0??22000??0?0011132?01010????010002?0110?2??110???0?2??1?0????0???0?1202???????2?????11?????0110[1 2][2 3]10000021100102???112001??1010001100011010011[1 2]??1111110[0 1]00001001???1?001?????????????????????0
Papoulemys_laurenti	001?0100000001101100?001??30?000100000001?010?10??0?00110?000?001----0110010-000220001000001113??0101001010100020011012??110000022??????????????????20?????0?????0?1?????0110121000?011110??2011112001??10100011000110??0111??11111110001010011002000??????????????????????0
Mogharemys_blackenhorni	0????1?0?000????????10??11?0100?10????00????????????0111?10?00???????02-0110-01002000100?00111?2?01010?1??0?0012011100?001100??02200???????????????????????????????????????????????????????????????????????????????????????????????????????????????????????????0???????????0
Brontochelys_gaffneyi	0?1?0100?0000???????10??11???00?10????0???????????0101022-0000??1----1??01210010???????????11132?01010????0?0?120?11012?01?00??1220??????????????????????????????????????????????????????????????????????????????????????????????????????????????????1?????????????????????0
Lemurchelys_diasphax	001?0100?0000???????10??11???00?10????0010111110200101022-0000??1----12-01211010?2???2?1110111?2?01010?1??0?0002001101200110010122???????????????????????????????????????????????????????????????????????????????????????????????????????????????????1?????????0???????????0
Shweboemys_pilgrimi	001?01000000????????10???1?0?00?0?????001?111110200101022-000???1----?2-01211211???????????1?????0??????????0?12?02101??0??????122???????????????????????????????????????????????????????????????????????????????????????????????????????????????????2111110010?????0111?1?0
Stereogenys_cromeri	001?010000000?10??0010??1120?00?0000000010011?10??0101022-0000??1----12-0121121102???20111011132?010100???0?0012002101200110010121001?00-00003??2?1??????????????????????????????????????????????????????????????????????????????????????????????????[1 2]111110000?02?0011????0
Cordichelys_antiqua	0?1?0100100000101100100111201000000000001??11110??0?00022-0000001----1??01211?1002000100?1011132?0101001?1010012001101200110010122???????????????????????????????????????11202310000012?001?2011012001??02110110000110101111??11111110100010011001?001??????????0????1????00
Latentemys_plowdeni	001?010000000???????10??11???00?100000000?????????0100022-000???1----1??01210010?200010001111132?01010????0?0?12001101200110010122???????????????????????????????????????????????????????????????????????????????????????????????????????????????????2?????0??0?0200011101?0
Bairdemys_thalassica	0??????0?00?011?110010011120100010110000????????????0002?-100000?????10?0121?1100200020111111132?0101011110?0012001101200110110121??????????????????????????????????????????????????????????????????????????????????????????????????????????????????????????????0????1????00
Bairdemys_healeyorum	?????????????????????????????????????????????????????????????????????????????????2000???111?????????????????????????????????????????1000-00013?1???????????????????????0?012123100001211001?2111112001??021?00001011101?1111??1211111010011001???0?00???????????????????????
Bairdemys_venezuelensis	001?0100000101101100?001?12010001011000000011010??0100022-1000001----10?012101100200020111111132??10100111010012001101200110110121??1000-0000311211????????????????????1?011?4-?---00201001?2111112001???????0?????????01111??1?1111101001?0011001?001??????????0?????????00
Bairdemys_hartsteini	001?010000010?1011001001?120100?101100?010011010??0100022-10000?1----?0?012100?00200020011111132??1010?1?101001200110120?110010122???????????????????????????????????????????????????????????????????????????????????????????????????????????????????111111001010200??1????0
Bairdemys_sanchezi	001?0100000001101210100111?0?00010110000000???10??0100022-0000001-?-?1??012100?0020002001111113???101001?1010002001101200110110121??1000-00003?1211??????????????????????????????????????????????????????????????????????????????????????????????????1??????????0?????????10
Bairdemys_winklerae	001?01000001?1101110?001???????010110??0100??110??0100022-100?001-?-????012100???2000?001111113???????0111?10?1?0011012??1?0110122???????????????????????????????????????????????????????????????????????????????????????????????????????????????????1?????????????????????0
Piramys_auffenbergi	001?01?01000011??????00??????000????00?0101???????010?????????00?????????????????200020??1??1?????????????0??0??0??????10????10??????????????????????????????????????????????????????????????????????????????????????????????????????????????????????2?????????????????????0
;
cnames
{0 Skull_flattened high_skull_(as_in_Peltocephalus_dumerilianus) flat_skull_(as_in_Pelusios_castanoides) extremely_flattened_skull_(as_in_Hydromedusa_maximiliani);
{1 Dorsal_margin_of_apertura_narium_externa straight,_broadly_convex_margin_(Pelomedusa_subrufa) narrow_midline_process,_at_least_partially_dividing_external_nares_(Bothremys_cooki);
{2 NA,_nasals present_(Emydura_macquarii) absent_(Pelusios_castanoides);
{3 NA,_meet_on_midline_in_dorsal_view nasals_meet_(Hydromedusa_tectifera) nasals_do_not_meet,_completely_separated_by_frontal_process_(Chelodina_colliei);
{4 PF,_preorbital_skull_broad_ narrow,_equal_or_less_than_90?,_as_in_Podocnemis_expansa very_broad,_more_than_90?,_as_in_Bothremys_cooki;
{5 PF,_meet_on_midline_in_dorsal_view no_(Proganochelys_quenstendti) yes_(Pelusios_castanoides);
{6 PF,_pf-pal_contact no_contact_(Galianemys_emringeri) contact_present_in_anterior_wall_of_fossa_orbitalis_(Bothremys_maghrebiana);
{7 PF,_pf-pa_contact no_contact_(Galianemys_emringeri) present_(Phosphatochelys_tedfordi);
{8 FR,_interorbital_groove_ no_groove,_smooth_surface_as_in_Peltocephalus_dumerilianus surface_with_a_groove_as_in_Podocnemis_expansa;
{9 FR,_orbital_position facing_laterally,_anterolaterally_(as_in_Bairdemys_venezuelensis) facing_dorsolaterally_(as_in_Elseya_dentata) facing_dorsally_(as_in_Chelodina_colliei);
{10 FR,_cranial_process_of_frontal no_process,_smooth_cranial_edge_(Podocnemis_expansa) projecting_cranial_process_(Elseya_dentata);
{11 FR,_prefrontal/frontal flat_or_slight_convex_(Podocnemis_expansa) strongly_convex_dorsally_(Bairdemys_venezuelensis);
{12 FR,_foramen_interorbitale high_(Galianemys_emringeri) low_(Bothremys_maghrebiana);
{13 Lower_tempoeral_emargination,_extension_in_lateral_view absent_or_slight_(Peltocephalus_dumerilianus) reaches_ventral_margin_level_of_orbit_(Hamadachelys_escuilliei) reaches_dorsal_margin_level_of_cavum_tympani_(Lapparentemys_villavilensis) reaches_above_level_of_orbit_or_parietal_(Elseya_dentata);
{14 QJ,_quadratojugal absent_(Elseya_dentata) present_(Podocnemis_expansa);
{15 QJ-PA_contact contact_present_(Podocnemis_expansa) no_contact_(Pelomedusa_subrufa);
{16 QJ-PA_contact_extension short_contact_(as_in_Bauruemys_elegans) long_contact_(as_in_Podocnemis_expansa);
{17 Upper_temporal_emargination,_extension_in_dorsal_view no_emargination,_edge_of_the_emargination_caudal_or_on_the_same_plane_of_condylus_occipitalis_(Dacquemys_palaeomorpha) edge_of_the_emargination_rostral_to_the_condylus_occipitalis_plane_(Podocnemis_expansa) edge_rostral_to_condylus_occipitalis_plane_and_rostral_wall_of_the_otic_chamber_visible_in_dorsal_view_(Pelomedusa_subrufa);
{18 PA,_dorsal_portion_in_relation_to_adductor_fossa broadly_covers_adductor_fossa_(Podocnemis_expansa) covers_central_area_of_adductor_fossa_(Elseya_dentata) covers_little_of_adductor_fossa_(Phrynops_geoffroanus) parietal_does_not_cover_adductor_fossa_(Hydromedusa_tectifera);
{19 PA,_Lateral_edges_of_parietals parallel_or_subparallel_(Podocnemis_expansa) pentagon-shaped_parietal,_lateral_edges_diverging_(Bothremys_magrebiana) tapering_posteriorly_(Hydromedusa_tectifera) reduced_in_their_medial_portion_('wasp-waisted')_(Acantochelys_radiolata);
{20 PA,_sulcus_palatinopterygoideus high_(Galianemys_emringeri) low_due_to_thicker_pa,_po_(Bothremys_maghrebiana);
{21 PA,_enters_orbital_margin no_(Galianemys_emringeri) yes_(Phosphatochelys_tedfordi);
{22 PA,_PA-JU_contact no_contact_(Elseya_dentata) contact_present_(Podocnemis_expansa);
{23 PA,_PA-SQ_contact present_(Proganochelys_quenstendti) absent_(Pelusios_castanoides);
{24 PA,_parietal_contacts_pterygoid_at_base_of_processus_trochlearis_pterygoidei no_contact_(Pelusios_castanoides) present,_ventral_parietal_process_on_lateral_side_of_sulcus_palatinopterygoideus_(Bothremys_maghrebiana);
{25 PA,_PA-PT_contact_in_septum_orbitotemporale absent_(Peltocephalus_dumerilianus) present_and_wider_(Bairdemys_venezuelensis) present_and_narrower_(Podocnemis_expansa);
{26 PA,_interparietal_scale equilateral_triangle_(Bauruemys_elegans) elongate_triangle_(Erymnochelys_madagascariensis) parallel_sided_(Bairdemys_thalassica) slightly_elongated_heart-like_shaped_(Neochelys_franzeni;
{27 PA,_Interparietal_scale,_anterior_margin anterior_to_the_frontal_parietal_suture_(Podocnemis_expansa) posterior_to_the_frontal_parietal_suture_(Dacquemys_palaeomorpha);
{28 PA,_parietal_scales_meeting_medially yes_(Podocnemis_expansa) no_(Peltocephalus_dumerilianus);
{29 JU,_narrow_dorsoventrally broader_(Bothremys_cooki) narrower_(Taphrosphys_ippolitoi);
{30 JU,_jugal_retracted_from_orbital_margin enters_orbit_(Pelusios_castanoides) retracted_from_orbit_(Cearachelys_placidoi);
{31 JU-QU_contact no_contact_(Bothremys_maghrebiana) contact_present_(Azzabbaremys_moragjonesi);
{32 JU-PT_contact no_contact_(Cordichelys_antiqua) contact_present_(Podocnemis_expansa);
{33 JU,_exposure_in_triturating_surface no_exposure_(Pelusios_castanoides) exposed_on_triturating_surface_(Bothremys_cooki);
{34 SQ,_caudal_projection lacks_projection_(Pelusios_castanoides) forms_distinct_process,_projecting_posteriorly_(Bothremys_maghrebiana) forms_distinct_process,_projecting_posterodorsally_(Hydromedusa_tectifera);
{35 SQ,_caudoventral_vertical_flange absent_(Galianemys_emringeri) present_(Labrostochelys_galkini);
{36 SQ,_lateral_tubercle absent_(Galianemys_emringeri) present_(Labrostochelys_galkini);
{37 SQ,_lateral_surface,_origin_site_of_the_depressor_mandibulae_muscles_ convex_to_slightly_flat_as_in_Podocnemis_expansa strongly_concave_as_in_Elseya_dentata;
{38 PO,_septum_orbitotemporale postorbital_wall_closed_(Galianemys_emringeri) postorbital_wall_at_least_partially_open_(Phosphatochelys_tedfordi);
{39 PO,_size larger_or_equal_to_orbit_(Peltocephalus_dumerilianus) smaller_than_orbit_(Podocnemis_expansa);
{40 PM,_pinched_snout no_pinched_snout,_convex_or_straight_rostral_outline_(Podocneims_expansa) pinched_snout,_concave_outline_near_premaxilla-maxilla_contact_(Peltocephalus_dumerilianus);
{41 PM,_dorsal_sulcus smooth_surface_(Bothremys_maghrebiana) sulcus_on_dorsal_surface,_parallel_to_anterior_margin_(Phosphatochelys_tedfordi);
{42 PM,_protrudes_cranially_in_lateral_view_beyond_apertura_narium_externa_dorsal_ridge does_not_protrude_or_protrudes_slightly_(Galianemys_emringeri) protrudes_in_lateral_view_(Bothremys_maghrebiana);
{43 PM,_midline_depression_in_ventral_view no_depression,_shallow_or_indistinct_(Euraxemys_essweini) depression_present_(Bothremys_cooki);
{44 PM,_shape_of_the_midline_depression_in_ventral_view narrow_depression_(Rosasia_soutoi) wide_depression_(Bothremys_cooki);
{45 PM,_cranial_pit_on_ventral_surface no_(Podocnemis_expansa) yes_(Peltocephalus_dumerilianus);
{46 PM,_premaxillae_reach_apertura_narium_interna no_(Podocnemis_expansa) yes_(Pelomedusa_subrufa);
{47 PM,_One_or_two_accessory_ridges_on_the_ventral_surface_of_the_premaxilla no_accessory_ridges_(Peltocephalus_dumerilianus) accessory_ridges_present_(Podocnemis_expansa);
{48 PM,_foramen_prepalatinum absent_(Pseudemydura_umbrina) present_in_premaxilla-maxilar_suture_(Elseya_dentata) present_in_premaxilla_only,_or_in_premaxilla-vomer_contact_(Araripemys_barretoi);
{49 PM,_foramen_prepalatinum_relative_to_triturating_ridge on_flat_surface_(Emydura_macquarii) under_triturating_surface_(Elseya_dentata);
{50 MX,_dorsal_process_onto_skull_roof not_developed,_mx_not_constricting_PF_nor_forming_part_of_the_rostrodorsal_margin_of_orbit_(Galianemys_emringeri) developed_rostrodorsally_constricting_PF_(Bothremys_maghrebiana) developed_rostrodorsally,_forming_part_of_the_dorsal_margin_of_orbit_(Hydromedusa_tectifera);
{51 MX,_orbital-narial_bar_width very_narrow,_less_than_half_the_diameter_of_orbit_(Hydromedusa_tectifera) roughly_equal_or_slightly_less_than_diameter_of_orbit_(Cearachelys_placidoi) larger_than_diameter_of_orbit_(Bothremys_maghrebiana);
{52 MX,_below_orbit small,_equal_or_less_than_orbital_diameter_(Galianemys_emringeri) well_developed,_greater_than_orbital_diameter_(Bothremys_maghrebiana);
{53 MX,_labial_ridge_in_ventral_view high_(Elseya_dentata) low_(Phrynops_geoffroanus);
{54 MX,_posterior_lingual_ridge_near_the_maxilla-palatine_contact_ undistinguishable_or_very_shallow_ridge_(Euraxemys_essweini) well_defined_ridge_(Peltocephalus_dumerilianus);
{55 MX,_triturating_surfaces narrow_as_in_Euraxemys_essweini wide_as_in_Cearachelys_placidoi very_wide_as_in_Bothremys_cooki;
{56 MX,_triturating_surfaces_shape lingual_and_labial_ridges_parallel_sided_(Podocnemis_expansa) triangular,_wide_caudally_(Lapparentemys_vilavilensis) triangular,_very_wide_caudally_(Bothremys_maghrebiana);
{57 MX,_medial_expansion_of_triturating_surface absent_(Bauruemys_elegans) present,_forming_median_maxillary_ridge_(Podocnemis_expansa);
{58 MX,_triturating_surface_convexity absent_or_shallow_(Podocnemis_expansa) deep_(Bairdemys_hartsteini);
{59 MX,_accessory_ridge absent_(Pelomedusa_subrufa) present_(Elseya_dentata);
{60 MX,_pits absent_(Kurmademys_kallamedensis) present_(Bothremys_cooki);
{61 MX,_exposure_in_orbital_floor broadly_exposed_(Galianemys_emringeri) narrowly_or_not_exposed_(Azzabbaremys_moragjonesi);
{62 MX,_MX-QJ_contact no_contact_(Euraxemys_essweini) contact_present_(Galianemys_emringeri);
{63 MX,_MX-QU_contact no_contact_(Podocnemis_expansa) contact_present_(Taphrosphys_sulcatus);
{64 VO,_vomer present_(Phrynops_geoffroanus) absent_(Pelomedusa_subrufa);
{65 VO,_VO-PM_contact absent_(Phrynops_geoffroanus) present_(Bauruemys_elegans);
{66 VO,_VO-MX_contact present_(Proganochelys_quenstedti) absent_(Azabbaremys_moragjonesi);
{67 VO,_VO-PT_contact vomer_contacts_pterygoid_(Phrynops_geoffroanus) vomer_does_not_contact_pterygoid_(Elseya_dentata);
{68 VO,_central_bar sutured_at_both_ends_as_in_Podocnemis_expansa sutured_only_rostrally_as_in_Azzabaremys_moragjonesi;
{69 PAL,_fossa_orbitalis_posterior_pocket absent_(Podocnemis_expansa) present_in_septum_orbitotemporale_(Bairdemys_venezuelensis);
{70 PAL,_foramen_palatinum_posterius present,_only_in_palatine_(Podocnemis_expansa) present,_both_in_palatine_and_pterygoid_(Galianemys_emringeri) extremely_reduced_to_absent_(Dacquemys_palaeomorpha);
{71 PAL,_foramen_palatinum_posterius in_floor_of_orbit_(Proganochelys_quenstedti) behind_orbit,_in_floor_of_sulcus_palatinopterygoideus_(Pelusios_castanoides);
{72 PAL,_apertura_narium_interna_ small_to_moderate,_caudal_edge_formed_only_by_palatines_(Podocnemis_expansa) large_due_to_reduction_of_palatines,_caudal_edge_formed_by_palatines_and_pterygoids_(Hydromedusa_tectifera);
{73 PAL,_dorsally_arched_palate absent_(Galianemys_emringeri) present_(Peltocephalus_dumerilianus);
{74 PAL,_palatine_extent_in_triturating_surface narrow_or_absent_(Elseya_dentata) moderate,_but_much_less_than_extent_of_maxilla_(Podocnemis_expansa) large,_equal_to_or_slightly_less_than_extent_of_maxilla_(Bothremys_cooki);
{75 PAL,_secondary_palate absent_(Podocnemis_expansa) present_(Bairdemys_venezuelensis);
{76 PAL,_secondary_palate,_medial_edges_of_palatal_cleft curved_(Bairdemys_venezuelensis) parallel_(Stereogenys_cromeri);
{77 PAL,_caudal_development poorly_developed_as_in_Podocnemis_expansa developed,_reducing_the_contact_between_pterygoids_as_in_Baidemys_venezuelensis well-developed,_reaching_the_basisphenoid_as_in_Stereogenys_cromeri;
{78 PAL,_dorsal_process_reaches_frontal does_not_reach_frontal_(Podocnemis_expansa) reaches_frontal_(Stereogenys_cromeri);
{79 PAL,_dorsal_process_contacts_parietal_in_septum_orbitotemporale does_not_contact_(Podocnemis_expansa) contacts_parietal_in_septum_orbitotemporale_(Stereogenys_cromeri);
{80 QU,_fossa_precolumellaris very_small_to_absent_(Galianemys_emringeri) present_but_shallow_(Euraxemys_essweini) deep_and_well_defined_(Pelusios_castanoides);
{81 QU,_incisura_columellae_auris no_posterior_bony_restriction_(Euraxemys_essweini) eustachian_tube_separated_from_stapes_by_bone_or_narrow_fissure_(Foxemys_mechinorum) eustachian_tube_and_stapes_enclosed_by_bone_in_the_same_opening_(Podocnemis_expansa);
{82 QU,_stapes_contained_in_bony_canal no_(Euraxemys_essweini) yes_(Bothremys_cooki);
{83 QU,_ventral_process_of_the_sulcus_eustachii no_ventral_process_(Bothremys_cooki) ventral_process_present_(Labrostochelys_galkini);
{84 QU,_trough_on_closed_incisura_columellae_auris_ridge absent_(Bothremys_maghrebiana) present_(Galianemys_emringeri);
{85 QU,_entrance_of_the_antrum_postoticum large_to_moderate_(Pelusios_castanoides) small_(Podocnemis_expansa) very_small_and_slitlike_(Bairdemys_thalassica) antrum_postoticum_absent_(Nigeremys_gigantea);
{86 QU,_shelf_below_cavum_tympani absent_(Galianemys_emringeri) lower_portion_of_cavum_tympani_unusually_deep_(Bothremys_maghrebiana);
{87 QU,_condylus_mandibularis_position rostral_to_BO-BS_suture_(Pelusios_castanoides) caudal_to_or_on_BO-BS_suture_(Galianemys_emringeri) caudal_to_condylus_occipitalis_(Nigeremys_gigantea);
{88 QU,_condylus_mandibularis_shape much_wider_than_long,_with_anterior_and_posterior_edges_straight_to_concave_making_it_shorter_at_midline_(Bothremys_cooki) slightly_wider_than_long_in_a_'kidney_bean'_shape,_with_anterior_edge_straight_to_concave_and_posterior_edge_convex_(Podocnemis_unifilis);
{89 QU,_ventral_outline_in_lateral_view smooth,_condylus_mandibularis_very_close_to_the_cavum_tympani_region_(Araripemys_barretoi) ventral_projection,_condylus_mandibularis_separated_from_the_cavum_tympani_region_(Bothremys_cooki);
{90 QU,_eustachian_tube_separated_from_fenestra_postotica no_(Podocnemis_expansa) yes_(Bairdemys_hartsteini);
{91 QU,_QU-BO_contact no_contact_(Elseya_dentata) contact_present_(Podocnemis_expansa);
{92 PT,_processus_trochlearis_pterygoidei oblique_(Phrynops_geoffroanus) right_angle_(Podocnemis_expansa);
{93 PT,_fossa_pterygoidea/cavum_pterygoideum absent_as_in_Euraxemys_essweini well_defined_as_in_Cearachelys_placidoi;
{94 PT,_pterygoid_flange absent_(Proganochelys_quenstedti) very_short_(Phrynops_geoffroanus) moderate,_does_not_reach_the_quadrate_ramus_of_pterygoid_(Brasilemys_josai) well_developed,_passing_the_quadrate_ramus_of_the_pterygoid_and_covering_the_fossa_pterygoidea,_forming_the_cavum_pterygoideum_(Podocnemis_expansa);
{95 PT,_anterior_opening_of_cavum_pterygoidei small_opening_(Bauruemys_elegans) moderate_opening_(Podocnemis_expansa) large_opening_with_foramen_cavernosum_in_roof_(Bairdemys_venezuelensis);
{96 PT,_foramen_caroticum_palatinum present_(Emydura_macquarii) absent_(Pelusios_castanoides);
{97 PT,_trigeminal_ridge_(PT_+_QU) absent_(Galianemys_emringeri) ridge_extending_posteroventrally_from_foramen_nervi_trigemini_to_condylus_mandibularis_(Phosphatochelys_tedfordi);
{98 Foramen_posterius_canalis_carotici_interni_position_in_relation_to_BS restricted_to_BS_(Kurmademys_kallamedensis) on_BS_edge_with_another_bone_(Cearachelys_placidoi) outside_BS_(Pelusios_castanoides);
{99 Foramen_posterius_canalis_carotici_interni_position_in_relation_to_fenestra_postotica_cranial_edge rostral_to_fenestra_postotica_rostral_edge_(Pelomedusa_subrufa)_ on_fenestra_postotica_rostral_edge_(Phrynops_geoffroanus)_;
{100 Foramen_posterius_canalis_carotici_interni_position_in_relation_to_PT_ignoring_the_BS_relation restricted_to_PT_(Cearachelys_placidoi)_ on_PT_edge_with_another_bone_(QU_or_PR)_(Bothremys_cooki) outside_PT_(Hydromedusa_tectifera);
{101 Foramen_posterius_canalis_carotici_interni_on_quadrate outside_quadrate_(Podocnemis_unifilis)_ on_quadrate_(Bothremys_maghrebiana);
{102 SO,_roof_exposure SO_not_exposed_on_roof_(Pelusios_castanoides) little_exposure_of_SO_on_roof_(Elseya_dentata) large_exposure_of_SO_on_roof_(Pseudemydura_umbrina);
{103 SO,_crista_supraoccipitalis not_elongated_caudal_to_the_foramen_magnum_(Pelusios_castanoides) elongated_caudal_to_the_foramen_magnum_(Podocnemis_expansa);
{104 SO,_bulbous_ending_of_crista_occipitalis flat_ending_(Podocnemis_expansa) bulbous_ending_(Bairdemys_thalassica);
{105 SO,_horizontal_plate_along_ventral_edge_of_crista_supraoccipitalis flat_or_very_slim_horizontal_plate_on_ventral_edge_(Phrynops_geoffroanus) horizontal_plate_along_ventral_edge_(Podocnemis_unifilis)_;
{106 SO,_supraoccipital_lateral_margin_on_otic_chamber contacts_PR_and_OP_but_not_QU_(Phrynops_geoffroanus)_ contacts_QU_(Bothremys_cooki);
{107 SO,_supraoccipital_lateral_margin_on_roof contacts_SQ_(Hydromedusa_tectifera) does_not_contact_SQ_(Pelomedusa_subrufa)_;
{108 EX,_ventral_process absent_to_very_short_(Pelusios_castanoides) present,_EX-BS_contact_avoiding_BS-QU_contact_in_ventral_view_of_the_skull_(Euraxemys_essweini);
{109 EX,_condylus_occipitalis basioccipital_plus_both_exoccipitals_(Euraxemys_essweini) exoccipitals_only_(Pelusios_castanoides);
{110 EX,_foramina_nervi_hypoglossi separated_(Podocnemis_expansa) combined_and_recessed_(Bairdemys_thalassica);
{111 EX,_foramen_jugulare_posterius not_formed_in_bone_(Notoemys_laticentralis) partially_openned_(Galianemys_emringeri) closed_completely_(Phrynops_geoffroanus);
{112 EX,_dorsal_processes_of_exoccipitals_ do_not_meet_medially_(Elseya_dentata) meeting_dorsal_to_the_foramen_magnum_(Acantochelys_radiolata);
{113 EX-QU_contact no_contact_(Elseya_dentata) narrow_contact_(Euraxemys_essweini) extensive_contact_(Podocnemis_expansa);
{114 BO,_length long,_length/width_=>_0.60_(Pelusios_castanoides) short,_0.60_>_length/width_=<_0.25_(Bothremys_cooki) very_short,_length/width_<_0.25_(Shweboemys_pilgrimi);
{115 BO,_basioccipital_tubera_width_in_occipital_view closer_to_median_(Bauruemys_elegans) farther_from_median_(Podocnemis_expansa);
{116 BO,_horizontal_occipital_shelf absent_(Elseya_dentata) present_(Podocnemis_expansa);
{117 BO,_basioccipital_lateral_edges does_not_contact_opisthotic_(Galianemys_emringeri) contacts_opisthotic_(Pelomedusa_subrufa);
{118 PR,_ventral_exposure,_out_of_cavum_pterygoideum most_of_PR_exposed_ventrally_(Phrynops_geoffroanus) about_half_covered_by_QU_+_BS_(Euraxemys_essweini) nearly_all_covered_by_QU,_BS,_PT_(Podocnemis_expansa);
{119 PR,_foramen_stapediotemporale opens_dorsally_(Pelusios_castanoides) opens_cranially_(Galianemys_emringeri);
{120 PR,_foramen_stapediotemporale/foramen_nervi_trigemini separated_by_most_of_prootic_(Pelusios_castanoides) separated_by_narrow_bar_of_prootic_(Bothremys_cooki);
{121 OP,_processus_interfenestralis_covered_ventrally visible_ventrally_(Emydura_macquarii) coverd_by_bone_(Podocnemis_expansa);
{122 OP,_fenestra_postotica_closed_medially open_(Euraxemys_essweini) closed_by_OP-QU_contact_(Podocnemis_expansa);
{123 OP,_fenestra_postotica_shape more_open_(Euraxemys_essweini) small,_horizontal_slit_(Galianemys_emringeri);
{124 OP,_opisthotic_and_exoccipital_project_ventrally_forming_a_flange_over_the_foramen_jugulare_posterius_ no_(Podocnemis_expansa) yes_(Bairdemys_sanchezi);
{125 OP,_processus_paraoccipitalis_in_ventral_view projects_caudally_beyond_SQ_(Euraxemys_essweini) smaller,_rostral_to_SQ_(Galianemys_emringeri);
{126 OP,_caudal_surface smooth_edge_(Galianemys_emringeri) thin_lateral_and_horizontal_flange_present_on_posterior_edge_(Chedighaii_hutchisoni) thin_horizontal_flange_extending_medially_from_the_fenestra_to_the_lateral_contact_with_sq_(Chelodina_coillei);
{127 BS,_ventral_outline pentagonal_(Cearachelys_placidoi) triangular_(Euraxemys_essweini) v-shaped_(Nigeremys_gigantea);
{128 BS,_rostral_margin_of_basisphenoid very_long_rostral_process_in_ventral_view_at_least_partially_dividing_the_pterygoids_(Chelodina_coillei) short_rostral_process_in_ventral_view_(Sokatra_antitra) no_rostral_process_in_ventral_view_(Peltocephalus_dumerilianus);
{129 BS,_BS-QU_contact absent_(Euraxemys_essweini) present,_very_narrow_(Bothremys_cooki) present,_wider_(Galianemys_emringeri);
{130 BS,_processus_clinoideus present,_with_abducens_canal_(Pelusios_castanoides) absent,_nervi_abducens_canal_is_a_groove_(Bothremys_cooki);
{131 BS,_sella_turcica/dorsum_sella deep,_well-defined_margins_(Taphrosphys_sulcatus) very_shallow,_low_margins_(Bothremys_cooki);
{132 SP,_splenial present_(Proganochelys_quenstedti) absent_(Pelusios_castanoides);
{133 DEN,_widely_exposed_on_lateral_surface yes,_in_posterior_part_of_jaw_(Euraxemys_essweini) no,_covered_by_surangular_(Bothremys_cooki);
{134 DEN,_internal_angle_between_rami acute,_between_40?_and_90?_(Podocnemis_unifilis) obtuse,_over_90?_(Phrynops_geoffroanus)_;
{135 DEN,_high_lingual_ridge no_(Pelusios_castanoides) yes_(Bothremys_cooki);
{136 DEN,_U-shaped_lingual_ridges form_U-shape,_also_wedge_(Bothremys_cooki) form_V-shape_(Podocnemis_unifilis);
{137 DEN,_accessory_ridges absent_(Peltocephalus_dumerilianus) present_(Podocnemis_unifilis);
{138 DEN,_pits no_(Euraxemys_essweini) yes_(Bothremys_cooki);
{139 DEN,_sutured_symphysis symphysis_fused_(Bothremys_cooki) symphysis_sutured_(Euraxemys_essweini);
{140 DEN,_symphyseal_hook no_hook_on_rostral_edge_(Proganochelys_quenstedti) hooked_rostral_edge_(Peltocephalus_dumerilianus);
{141 DEN,_triturating_surfaces narrow_as_in_Euraxemys_essweini wider_as_in_Podocnemis_unifilis_ wide_posteriorly_as_in_Cearachelys_placidoi__ wide_anteriorly_as_in_Bairdemys_venezuelensis__;
{142 SUR,_foramen_nervi_auriculotemporalis absent_(Proganochelys_quenstedti) present_(Podocnemis_unifilis);
{143 COR,_wide_lateral_exposure no_(Euraxemys_essweini) yes_(Bothremys_cooki);
{144 COR,_participates_on_triturating_surface no_or_slightly_(Bothremys_maghrebiana) yes,_lingual-caudal_portion_formed_by_coronoid_(Podocnemis_expansa) yes,_caudal_portion_formed_by_coronoid_(Stereogenys_cromeri);
{145 PRA,_fossa_meckelii_open_cranially closed_by_long_ang-pra_contact_and/or_splenial_(Euraxemys_essweini) more_open,_short_pra-ang_contact_(Bothremys_cooki);
{146 ART,_processus_retroarticularis short,_absent_(Pelusios_castanoides) long,_posterior_(Bothremys_cooki) long,_posteroventral_(Podocnemis_unifilis);
{147 ART,_foramen_chorda_tympani_enclosed_in_processus_retroarticularis no_(Podocnemis_expansa) yes_(Erymnochelys_madagascariensis);
{148 VT,_cervical_articulations amphicoelous,_platycoelous_(Proganochelys_quenstedti) (2(_(3(_(4(_(5)_)6)_)7(_(8)_(Phrynops_geoffroanus) (2)_)3)_)4)_)5)_)6)_)7)_)8)_(Podocnemis_expansa);
{149 VT,_Cervical_vertebrae_length smaller_than_trunk_vertebrae_(Podocnemis_expansa) longer_than_trunk_vertebrae_(Chelodina_coillei);
{150 VT,_Elements_of_atlantal_neural_arch dorsally_suturally_attached_(Emydura_macquarii) dorsally_fused_(Hydromedusa_tectifera);
{151 VT,_Atlantal_intercentrum suturally_attached_to_atlantal_centrum_(Phrynops_geoffroanus) fused_to_atlantal_centrum_(Hydromedusa_tectifera)_;
{152 VT,_Outline_of_atlantal_neural_arch_in_dorsal_view convex_or_subparallel_lateral_edges_(Pelomedusa_subrufa)_ lateral_edges_tapering_anteriorly_(Phrynops_hilarii) lateral_edges_'wasp-waisted'_(Chelus_fimbriatus);
{153 VT,_Orientation_of_atlantal_postzygapophyses ventromedial_(Pelusios_castanoides)_ dorsolateral_(Laganemys_tenerensis)_ ventral_(Hydromedusa_tectifera)_;
{154 VT,_cranial_process_of_neural_arch_in_axis present_(Phyrnops_geoffroanus) absent_(Hydromedusa_tectifera);
{155 VT,_cervical_centrum wider_than_high_(Platychelys_oberndorferi) usually_higher_than_wide_or_rounder_(Podocnemis_expansa);
{156 VT,_cervical_centra_saddle_shaped no_heterocoelic_vertebrae_(Phrynops_geoffroanus) completely_heterocoelic_(Podocnemis_unifilis) wide_(Erymnochelys_madagascariensis);
{157 VT,_Proportion_of_condyle_of_cervical_vertebra_8 higher_than_wide_(Chelodina_coillei)_ wider_than_high_(Pelomedusa_subrufa)_;
{158 VT,_Outline_of_condyle_of_cervical_vertebra_8 trapezoidal_or_sub-oval_with_shorter_ventral_side_(Chelus_fimbriatus) subrectangular_or_suboval_(Chelodina_coillei)_ trapezoidal_or_sub-oval_with_shorter_dorsal_side_(Hydromedusa_tectifera) kidney-like_(Pelomedusa_subrufa)_;
{159 VT,_Ventral_keel_in_cervical_vertebrae_8 ventrally_developed_(Elseya_dentata) slightly_or_not_developed_(Pelomedusa_subrufa);
{160 VT,_Shape_of_ventral_keel_on_cervical_8 smooth_straight_or_convex_ventral_edge_(Elseya_dentata) concave_ventral_edge_(Podocnemis_sextuberculata);
{161 VT,_Orientation_of_dorsal_process_of_neural_arch_in_cervical_vertebrae_ more_than_30_degrees_with_respect_to_vertebral_body_(Pelusios_castanoides)_ less_than_30_degrees_with_respect_to_vertebral_body_(Araripemys_barretoi);
{162 VT,_cervical_postzygapophyses separate_(Proganochelys_quenstedti)_ some_fused_(Podocnemis_unifilis);
{163 VT,_cervical_postzygapophyses separated_from_each_other_(Proganochelys_quenstedti) postzygapophyses_elevated_on_neural_spine_(Podocnemis_unifilis);
{164 VT,_Orientation_of_postzygapophyses_of_cervical_vertebra_8 ventrolateral_(Pelomedusa_subrufa) ventral,_horizontal_(Hydromedusa_tectifera) lateral,_vertical_(Chelus_fimbriatus);
{165 Coracoid_shape entirely_wide_and_plate-like_(Proganochelys_quenstedti) narrow,_almost_straight_longitudinally_and_slightly_wider_distally_(Podocnemis_unifilis) slightly_curved_longitudinally_and_much_wider_distally_(Pelusios_castanoides);
{166 Coracoid_dorsolongitudinal_ridge absent_(Peltocephalus_dumerilianus) present_(Podocnemis_expansa);
{167 Scapula,_angle_between_acromion_and_scapular_processess_ >_70?_(Podocnemis_expansa) =<_70?_(Bairdemys_venezuelensis);
{168 Claws_in_forefoot five_(Pelusios_castanoides)_ four_(Hydromedusa_tectifera)_;
{169 CAR,_nuchal_embayment no_(Emydura_macquarii) yes_(Chedighaii_barberi);
{170 CAR,_nuchal_bone_width greater_than_length,_2_times_or_more_(Notoemys_laticentralis)_ greater,_but_less_than_2_times,_or_equal_to_length_(Phrynops_geoffroanus) lesser_than_length_(Araripemys_barretoi);
{171 CAR,_nuchal_proportions cranial_width/greatest_width_<_0.40_(Turkanemys_pattersoni) 0.70_<_cranial_width/greatest_width_>=_0.40_(Phrynops_geoffroanus) cranial_width/greatest_width_>_0.70_(Cordichelys_antiqua);
{172 CAR,_first_pleural_scute_reaches_nuchal_ no_(Cearachelys_placidoi) yes_(Chedighaii_barberii);
{173 CAR,_neural_number 8_or_more_(Araripemys_barretoi) 7_neurals_(Foxemys_mechinorum) 6_(Kurmademys_kallamedensis) 5_or_less_(Phrynops_geoffroanus) no_neurals_(Bairdemys_venezuelensis);
{174 CAR,_neural_series_completeness to_suprapygal_(Euraxemys_essweini) to_costals_8_(Podocnemis_unifilis) to_costals_7_(Foxemys_mechinorum) to_costals_6_(Chedighaii_barberi) to_costal_5_&_4_(Phyrnops_geoffroanus) neurals_discontinuous_(Platemys_platycephala);
{175 CAR,_neural_series_pattern irregular_(Platychelys_oberndorferi) regular,_most_hexagonal,_coffin-shaped_(Podocnemis_unifilis) neurals_discontinuous_(Araiochelys_hirayamen);
{176 CAR,_First_neural_sutured_with_nuchal yes_(Phrynops_geoffroanus) no_(Chelodina_coillei)_;
{177 CAR,_position_of_four_sided_neural neural_one_(Euraxemys_essweini) neural_two_(Cearachelys_placidoi) neural_three_(Araripemys_barretoi) four-sided_neural_absent_(Platemys_platycephala);
{178 CAR,_keeled_neurals none_(Kenyemys_williamsi) at_least_some_(Erymnochelys_madagascariensis);
{179 CAR,_keels_or_knobs_on_costals no_keel_or_knob_on_costals_(Podocnemis_expansa) costals_with_keels_or_knobs_(Chelus_fimbriatus);
{180 CAR,_costal_one_length costal_1_shorter_or_equal_to_2_times_length_of_costal_2_(Euraxemys_essweini) costal_1_two_times_longer_than_2nd_costal_(Foxemys_mechinorum);
{181 CAR,_peripheral_1/costal_1_contact_length no_contact_(Hydromedusa_maximiliani) narrow_contact,_cranial_margin_2x_contact_(Foxemys_mechinorum) wide_contact,_anterior_margin_less_than_2x_contact_(Rosasia_soutoi);
{182 CAR,_peripheral_6_lateral_edge medially_inclined_towards_cranial_edge_(Araripemys_barretoi)_ almost_parallel_to_cranio-caudal_axis_(Phrynops_geoffroanus)_ medially_inclined_towards_caudal_edge_(Cordichelys_antiqua)_;
{183 CAR,_Suprapygal_sutured_with_peripheral_10 yes_(Chelodina_collei)_ no_(Pelusios_castanoides)_;
{184 CAR,_suprapygal-peripheral_11_contact large_(Phrynops_geoffroanus) small_(Pelomedusa_subrufa)_;
{185 CAR,_Proportions_of_peripheral_bones peripheral_bones_cranial_to_bridge_shorter_or_equal_size_than_caudal_ones_ones_(Emydura_macquarii)_ peripheral_bones_cranial_to_bridge_longer_than_caudal_ones_(Phrynops_geoffroanus)_;
{186 CAR,_thoracic_rib_1_versus_2 thoracic_rib_1_large_and_separate_from_thoracic_rib_2_(Notoemys_laticentralis) thoracic_rib_1_reduced,_almost_same_size_of_the_medial_portion_of_thoracic_rib_2,_both_separated_by_an_oval_elongated_space_(Podocnemis_expansa) thoracic_rib_1_shorter_than_the_medial_exposed_portion_of_thoracic_rib_2,_very_small_oval_space_between_them_(Chelus_fimbriatus);
{187 CAR,_articulation_facet_on_thoracic_rib_1 absent_(Podocnemis_expansa) present,_facet_or_tubercle_on_cranial_margin_of_thoracic_rib_1_(Notoemys_laticentralis);
{188 CAR,_costovertebral_tunnel large_anteriorly_and_posteriorly_only_(Proganochelys_quenstedti) large_entire_length_(Platychelys_oberndorferi) small_(Chedighaii_barberi);
{189 CAR,_intumescence_from_axillary_buttress_to_the_rib_area_on_costal_1 no_(Podocnemis_unifilis)__ yes_(Bairdemys_venezuelensis);
{190 CAR,_axillary_buttress_scar_on_costals contact_only_peripherals,_no_contact_with_costal_1_(Hydromedusa_maximiliani) contact_present_but_separated_from_costal_2_suture_(Chedighaii_barberi) contact_present_and_close_to_costal_2_(Chelus_colombianus);
{191 CAR,_axillary_buttres_contact_with_costal_1 runs_parallel_to_rib-gomphosis_of_costal_1_(Phrynops_geoffroanus) runs_in_a_divergent_angle_between_15_and_50_degrees_to_rib-gomphosis_(Elseya_dentata);
{192 CAR,_axillary_buttress_extent_on_ventral_surface_of_peripherals reaches_peripheral_2_(Emydura_macquarii)_ reaches_peripheral_3_(Pelusios_castanoides)_ reaches_peripheral_4_(Phrynops_hilarii)_ reaches_peripheral_5_(Hydromedusa_tectifera)_;
{193 CAR,_inguinal_buttress_on_costals short_or_absent_(Proganochelys_quenstedti) contacts_costal_5,_extending_medially_onto_it_(Chedighaii_barberi) restricted_to_costal_4_(Chelus_fimbriatus);
{194 CAR,_Inguinal_buttress_on_peripheral 6_(Chelodina_coillei)_ 7_(Hydromedusa_tectifera)_ 8_(Phrynops_geoffroanus)_;
{195 CAR,_iliac_scar_reaches_costal_7 yes_(Pelusios_castanoides) no_(Elseya_dentata);
{196 CAR,_iliac_scar_reaches_suprapygal no_(Pelusios_castanoides) yes_(Elseya_dentata);
{197 CAR,_Cervical_scute present_(Emydura) absent_(Podocnemis);
{198 CAR,_Cervical_scute_position between_marginal_scutes_(Phrynops_geoffroanus)_ behind_marginal_scutes_(Hydromedusa_tectifera)_;
{199 CAR,_Cervical_Scute_Shape width_greater_than_or_equal_to_length_(Hydromedusa_tectifera)_ width_smaller_than_length_(Phrynops_geoffroanus)_;
{200 CAR,_first_marginal_scute_shape trapezoidal_(Podocnemis_unifilis)_ rectangular_(Erymnochelys_madagascariensis)_ triangular_(Araripemys_barretoi)_;
{201 CAR,_marginal_scale_1_proportion_overlapping_the_cranial_margin/portion_of_peripheral_bone less_than_30%_(Erymnochelys_madagascariensis)_ between_30_to_60%_(Phrynops_geoffroanus)_ more_than_60%_(Cordichelys_antiqua)_;
{202 CAR,_vertebral_scale_width equal_to_or_wider_than_pleural_scales_((Pseudemydura_umbrina)__) narrower_than_pleural_scales_(Foxemys_mechinorum);
{203 CAR,_vertebral_scale_1_reaches_cranial_margin_of_carapace no,_first_marginals_and_or_cervical_scales_(Podocnemis_unifilis) yes_(Araripemys_barretoi);
{204 CAR,_relative_width_of_vertebral_scute_1 first_three_vertebral_scute_equal_or_sub-equal_in_width_(Pelusios_castanoides)_ first_vertebral_scute_wider_than_second_and_third_(Phrynops_geoffroanus)_;
{205 Generalised_shell_shape high_domed_(Elseya_dentata)_ dorso-ventrally_flattened_(Phrynops_geoffroanus)_;
{206 CAR,_vertebral_scale_1_shape_of_the_craniolateral_margins lateral_margins_parallel_or_subparallel_to_midline_axis_of_carapace_(Elseya_dentata)_ lateral_margins_cranially_divergent_or_'houglass"_shaped_(Phrynops_geoffroanus);
{207 CAR,_second_vertebral_scute_shape quadrangular_(Chelodina_collei) hexagonal_(Hydromedusa_tectifera) trapezoidal_(Araripemys_barretoi)_;
{208 CAR,_vertebral_scute_2_to_4_longer_than_wide no_(Chelus_fimbriatus) yes_(Chelodina_collei);
{209 CAR,_Vertebral_scute_5_reaches_last_neural no_(Pelusios_castanoides)_ yes_(Araripemys_barretoi)_;
{210 CAR,_Vertebral_scute_5_reaches_peripheral_10 'no (Phrynops geoffroanus)	' yes_(Elseya_dentata)_;
{211 CAR,_Vertebral_scute_5_reaches_peripheral_11 no_(Hydromedusa_tectifera)_ yes_(Phrynops_geoffroanus)_;
{212 CAR,_Vertebral_scute_5_reaches_Pygal no_(Hydromedusa_tectifera)_ yes_(Elseya_dentata)_;
{213 CAR,_pleural_scute_4_touches_suprapygal no_(Phrynops_geoffroanus) yes_(Platemys_platycephala)_;
{214 Position_of_the_posterior_edge_of_the_plastron_related_to_carapace_in_ventral_view above_C8_or_more_cranial,_peripherals_entirely_visible_(Araripemys_barretoi) above_peripherals_11_(Podocnemis_uniflis);
{215 PLA,_cranial_lobe_reaches_carapace_edge yes_(Cearachelys_placidoi) no_(Foxemys_mechinorum);
{216 PLA,_cranial_lobe_length long_to_medium,_width_over_length_<_=_2.0_(Podocnemis_unifilis) short,_width_over_length_>_2.1_(Chedighaii_barberi);
{217 PLA,_cranial_lobe wide,_squared_cranially,_lateral_margins_parallel_or_sub-parallel_(Platychelys_platycephala) narrow,_tapered_cranially,_lateral_margins_converging_cranially_(Emydura_macquarii);
{218 PLA,_Plastral_lobes cranial_lobe_as_long_as_or_longer_than_caudal_one_(Hydromedusa_tectifera) cranial_lobe_shorter_than_caudal_one_(Pelomedusa_subrufa)_;
{219 PLA,_posterior_lobe_lateral_outline concave_(Phrynops_geoffroanus)_ almost_straight_lined_(Euraxemys_essweini) convex_(Hydromedusa_tectifera)_;
{220 Foramina_on_suture_of_hypoplastron_and peripheral_7_(Chelus_fimbriatus)_ peripheral_8_(Podocnemis_unifilis);
{221 Foramina_on_suture_of_hyoplastron_and peripheral_3_(Podocnemis_unifilis) peripheral_4_(Chelus_fimbriatus);
{222 PLA,_entoplastron_shape arrow-shaped_with_caudolateral_processes_(Araripemys_barretoi) more_trapezoidal_(Podocnemis_unifilis) longer_than_wider_(Platemys_platycephala);
{223 CAR,_vertebral_scale_1_overlap_onto_cranial_peripherals_and_nuchal overlapping_nuchal,_peripherals_1_and_2_(Acantochelys_radiolata)_ overlapping_nuchal_and_peripherals_1_(Erymnochelys_madagascariensis) overlaping_only_nuchals_(Bairdemys_healeyorum)_;
{224 PLA,_mesoplastra present,_wider_than_long_(Notoemys_laticentralis) present,_rounder_and_lateral_(Podocnemis_expansa) absent_(Chelus_fimbriatus);
{225 PLA,_fontanella_between_hyo_and_hypoplastra yes_(Notoemys_laticentralis) no_(Podocnemis_expansa);
{226 PLA,_pectorals_on_entoplastron no_(Euraxemys_essweini) yes_(Foxemys_mechinorum);
{227 PLA,_pectoral_on_epiplastron no,_far_behind_epiplastron_(Cearachelys_placidoi) on_epiplastron,_on_epi-hyoplastron_suture_(Foxemys_mechinorum);
{228 PLA,_pectoral_on_mesoplastron yes_(Cearachelys_placidoi) anterior_to_mesoplastron_(Kurmademys_kallamedensis);
{229 PLA,_gular_scute small_,_humerals_contact_in_midline_(Cearachelys_placidoi) large,_separating_extragulars_and_humerals_(Taphrosphrys_sulcatus);
{230 PLA,_extragulars_size large,_almost_the_same_size_as_gular_(Chelus_fimbriatus) smaller_than_gular_(Pelomedusa_subrufa) extragulars_absent_(Araripemys_barretoi);
{231 PLA,_entoplastron_caudal_end_reaching_the_axillary_notch_level_of_plastron not_reaching_(Phrynops_geoffroanus) caudal_end_reaches_axillary_notch_(Foxemys_mechinorum);
{232 PLA,_extragulars_in_comparison_to_intergular separated_by_gular_(Peltocephalus_dumerilianus) larger_than_gular,_in_contact_in_midline_caudally_(Erymnochelys_madagascariensis);
{233 PLA,_gular_scales_reach_entoplastron yes_(Erymnochelys_madagascariensis)_ no_(Podocnemis_unifilis)_;
{234 PLA,_humeral_scale longest_length_humeral_<_longest_length_pectoral_(Elseya_dentata)__ longest_length_humeral_=_>_longest_length_pectoral_(Pelusios_castanoides)_;
{235 PLA,_abdominal_scale_length midline_length_abdominal_=_>_midline_length_anal_(Podocnemis_unifilis) midline_length_abdominal_<_midline_length_anal_(Taphrosphys_sulcatus);
{236 PLA,_strong_constriction_on_femural-anal_scute_on_xiphiplastra no,_smooth_edge_(Elseya_dentata) yes_(Phrynops_hilarii);
{237 PEL,_pelvis_sutured_to_shell no_(Proganochelys_quenstedti) yes_(Pelusios_castanoides);
{238 PLA,_pubic_scar_shape wider_as_in_Phrynops_hilarii_(largest_width/length_>0.40) narrower_as_in_Podocnemis_unifilis_(largest_width/length_<0.40);
{239 PLA,_ischial_scar_shape large_and_linear_or_V-shaped_(Podocnemis_unifilis) small_and_equidimensional_(Taphrosphys_sulcatus);
{240 PLA,_ischial_scar_position_related_to_the_lateral_edges_of_xiphiplastron far_from_the_caudal_and_lateral_edges_of_xiphiplastron_(Peltocephalus_dumerilianus) closer_to_the_caudal_and_lateral_edges_of_xiphiplastron_(Chelus_fimbriatus);
{241 PLA,_cranial_margin_width_of_gulars much_narrower_than_the_cranial_margin_of_intergular_(Taphrosphys_sulcatus) almost_the_same_width_as_the_cranial_margin_of_intergular_(Podocnemis_expansa) wider_than_the_cranial_margin_of_intergular_(Neochelys_laurenti) much_wider_than_the_cranial_margin_of_intergular_(Erymnochelys_madagascariensis);
{242 PLA,_ischial_scar_position_related_to_the_anal_notch_of_xiphiplastron the_most_caudal_tip_of_the_scar_reaches_the_level_of_the_anal_notch_(Podocnemis_expansa) the_most_caudal_tip_is_located_cranially_to_the_anal_notch_level_(Foxemys_mechinorum);
{243 PLA,_gular_position gular_reaches_cranial_margin_of_plastron_(Podocnemis_expansa) gular_retracted_from_cranial_margin_of_plastron_(Chelodina_colliei);
{244 PLA,_shape_of_caudal_process_of_xiphiplastron short_and_wide_(Podocnemis_expansa) long_and_narrow_(Chelus_fimbriatus);
{245 PM,_median_notch_in_upper_jaw notch_absent,_mx_and_pm_ventral_ridge_runs_anteroventrally,_forming_an_anterior_hook_(Peltocephalus_dumerilianus) notch_absent_or_very_shallow,_mx_and_pm_ventral_ridge_runs_anteriorly_to_the_midline_(Lemurchelys_diasphax) notch_present,_mx_and_pm_ventral_ridge_runs_anterodorsally_to_the_midline_(Podocnemis_unifilis);
{246 character_247,_Hermanson_et_al._;
{247 character_248,_Hermanson_et_al._;
{248 character_249,_Hermanson_et_al._;
{249 character_250,_Hermanson_et_al._;
{250 character_251,_Hermanson_et_al._;
{251 character_252,_Hermanson_et_al._;
{252 character_255,_Hermanson_et_al._;
{253 character_256,_Hermanson_et_al._;
{254 character_261,_Hermanson_et_al._;
{255 character_262,_Hermanson_et_al._;
{256 character_264,_Hermanson_et_al._;
{257 character_265,_Hermanson_et_al._;
{258 character_267,_Hermanson_et_al._;
{259 character_268,_Hermanson_et_al._;
{260 character_269,_Hermanson_et_al._;
{261 character_270,_Hermanson_et_al._;
{262 character_271,_Hermanson_et_al._;
{263 character_272,_Hermanson_et_al._;
{264 character_273,_Hermanson_et_al._;
{265 character_274,_Hermanson_et_al._;
{266 character_278,_Hermanson_et_al._;
{267 new_character:_posterior_process_of_maxilla absent,_or_only_minimally_developed extensive;
;
ccode	+ 0 9 13 17 18 50 51 55 56 74 77 80 81 85 87 94 95 98 100 102 111 113 114 118 127.129 170 171 173 174 181 182 192 194 201 219 223 224 230 241 *;
proc /;
comments 86
{28 17 2, not ?;
{28 19 1, not ?;
{28 24 0, not ?;
{28 39 0, not 1;
{28 56 0, not ?;
{28 57 0, not ?;
{28 61 1, not 0;
{28 81 1, not 2;
{28 82 1, not 0;
{28 84 -, not ?;
{28 102 1, not ?;
{28 103 ?, not 0;
{28 108 0, not ?;
{28 109 ?, not 0;
{28 121 ?, not 1;
{28 123 ?, not 0;
{28 125 ?, not 0;
{28 135 1, not 0;
{28 141 1, not ?;
{28 144 1, not ?;
{30 3 rescored as non applicable, not ?;
{30 8 0 not ?;
{30 11 0, not ?;
{30 25 0, not ?;
{30 54 0, not 1;
{30 57 0, not ?;
{30 78 0, not ?;
{30 79 1, not 0;
{30 84 -, not 1;
{30 109 ? not 0;
{30 115 0, not ?;
{30 128 1, not 2;
{30 132 1, not ?;
{30 134 0, not ?;
{30 137 0, not ?;
{30 144 1, not ?;
{30 176 0, not ?;
{30 178 rescored 0, not ?;
{30 183 1, not ?;
{30 206 ? not 1;
{30 216 ?, not 0;
{30 218 1, not 0;
{31 1 0, not ?;
{31 3 rescored as non applicable, not ?;
{31 8 0 not ?;
{31 11 0, not ?;
{31 14 1, not ?;
{31 22 0, not ?;
{31 31 0, not ?;
{31 34 0, not ?;
{31 35 0, not ?;
{31 36 0, not ?;
{31 37 0, not ?;
{31 53 0, not ?;
{31 56 1, not ?;
{31 57 0, not ?;
{31 58 0, not ?;
{31 65 1, not ?;
{31 70 1, not 0;
{31 72 0, not ?;
{31 73 0, not ?;
{31 74 0, not 1;
{31 100 2, not 0;
{31 102 0, not ?;
{31 106 0, not ?;
{31 109 1, not ?;
{31 114 0, not 1;
{31 116 0, not ?;
{31 119 0, not ?;
{31 120 0, not ?;
{31 128 1, not ?;
{37 4 1, not 0;
{37 13 1, not ?;
{37 22 0, not ?;
{37 39 0, not ?;
{37 54 0, not 1;
{37 56 1, not ?;
{37 57 0, not ?;
{37 62 0, not ?;
{37 63 0, not ?;
{37 72 ?, not 0;
{37 75 0, not ?;
{37 78 0, not ?;
{37 89 ?, not 1;
{37 115 0, not ?;
{37 125 ?, not 1;
;
